# Supplementary material for: Synthesis, characterization and ε-caprolactone polymerization properties of ferrocenyl modified half-sandwich rare-earth metal complexes
Source: Royal Society of Chemistry journal article supplement (doi:10.1039/d3nj04245f), 2023-01-01
Supplement: d3nj04245f1.pdf [file d3nj04245f1.pdf]

## Supporting Information

### **Synthesis, characterization and $\epsilon$ -caprolactone polymerization property of the ferrocenyl modified half-sandwich rare-earth metal complexes**

Min Li<sup>a,c</sup>, Yi Zhong<sup>c</sup>, Yunjie Luo<sup>c,\*</sup>, and Meng Deng<sup>b,\*</sup>

<sup>a</sup> Department of Basic Course, China Coast Guard Academy, Ningbo 315800, P. R.  
China

<sup>b</sup> School of Materials Science and Engineering, NingboTech University, Ningbo  
315100, P. R. China

<sup>c</sup> School of Materials Science and Chemical Engineering, Key Laboratory of  
Advanced Mass Spectrometry and Molecular Analysis of Zhejiang Province, Ningbo  
University, Ningbo 315211, P. R. China

## Table of Contents

**Figure S1.**  $^1\text{H}$  NMR spectrum of  $(\text{FcC}_5\text{Me}_4)\text{Sc}(\text{CH}_2\text{C}_6\text{H}_4\text{NMe}_2\text{-o})_2$  (**1**)

**Figure S2.**  $^{13}\text{C}$  NMR spectrum of  $(\text{FcC}_5\text{Me}_4)\text{Sc}(\text{CH}_2\text{C}_6\text{H}_4\text{NMe}_2\text{-o})_2$  (**1**)

**Figure S3.** FT-IR spectrum (KBr) of  $(\text{FcC}_5\text{Me}_4)\text{Sc}(\text{CH}_2\text{C}_6\text{H}_4\text{NMe}_2\text{-o})_2$  (**1**)

**Figure S4.**  $^1\text{H}$  NMR spectrum of  $(\text{FcC}_5\text{Me}_4)\text{Y}(\text{CH}_2\text{C}_6\text{H}_4\text{NMe}_2\text{-o})_2$  (**2**)

**Figure S5.**  $^{13}\text{C}$  NMR spectrum of  $(\text{FcC}_5\text{Me}_4)\text{Y}(\text{CH}_2\text{C}_6\text{H}_4\text{NMe}_2\text{-o})_2$  (**2**)

**Figure S6.** FT-IR spectrum (KBr) of  $(\text{FcC}_5\text{Me}_4)\text{Y}(\text{CH}_2\text{C}_6\text{H}_4\text{NMe}_2\text{-o})_2$  (**2**)

**Figure S7.**  $^1\text{H}$  NMR spectrum of  $(\text{FcC}_5\text{Me}_4)\text{Lu}(\text{CH}_2\text{C}_6\text{H}_4\text{NMe}_2\text{-o})_2$  (**3**)

**Figure S8.**  $^{13}\text{C}$  NMR spectrum of  $(\text{FcC}_5\text{Me}_4)\text{Lu}(\text{CH}_2\text{C}_6\text{H}_4\text{NMe}_2\text{-o})_2$  (**3**)

**Figure S9.** FT-IR spectrum (KBr) of  $(\text{FcC}_5\text{Me}_4)\text{Y}(\text{CH}_2\text{C}_6\text{H}_4\text{NMe}_2\text{-o})_2$  (**3**)

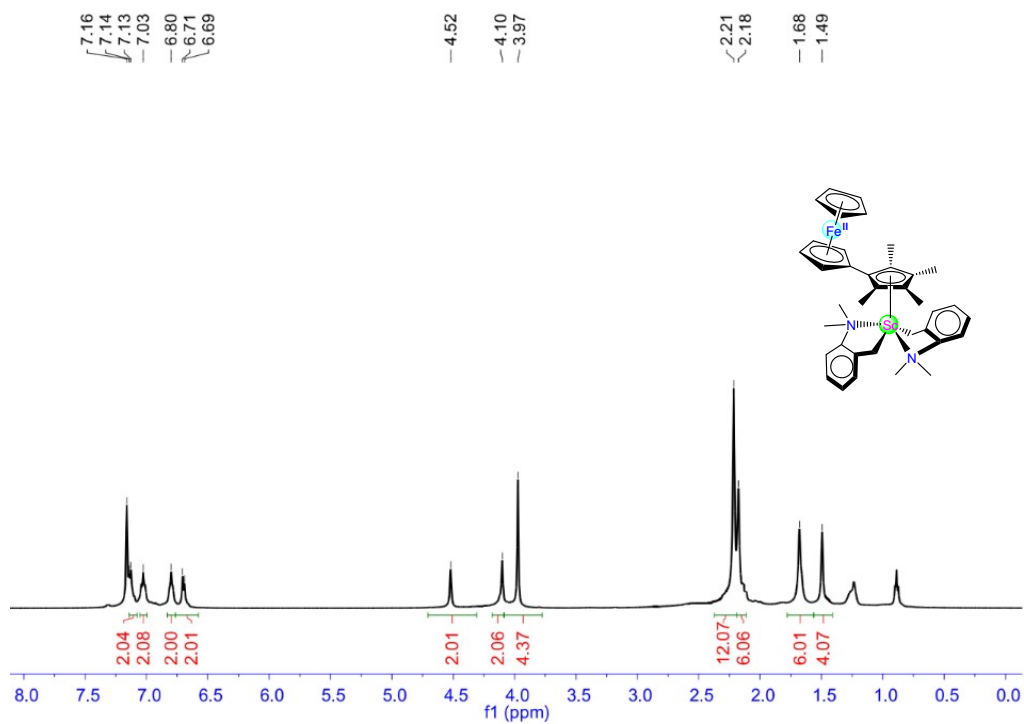

**Figure S1.**  $^1\text{H}$  NMR spectrum of  $(\text{FcC}_5\text{Me}_4)\text{Sc}(\text{CH}_2\text{C}_6\text{H}_4\text{NMe}_2\text{-o})_2$  (**1**) in  $\text{C}_6\text{D}_6$  (298K, 500 MHz)

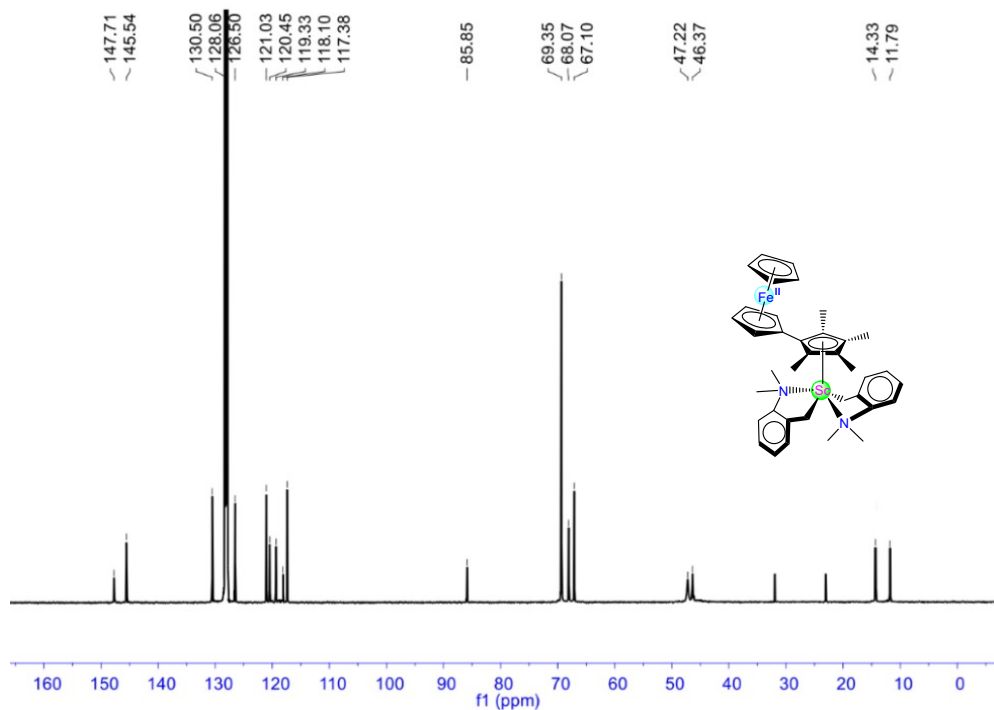

**Figure S2.**  $^{13}\text{C}$  NMR spectrum of  $(\text{FcC}_5\text{Me}_4)\text{Sc}(\text{CH}_2\text{C}_6\text{H}_4\text{NMe}_2\text{-o})_2$  (**1**) in  $\text{C}_6\text{D}_6$  (298K, 125 MHz)

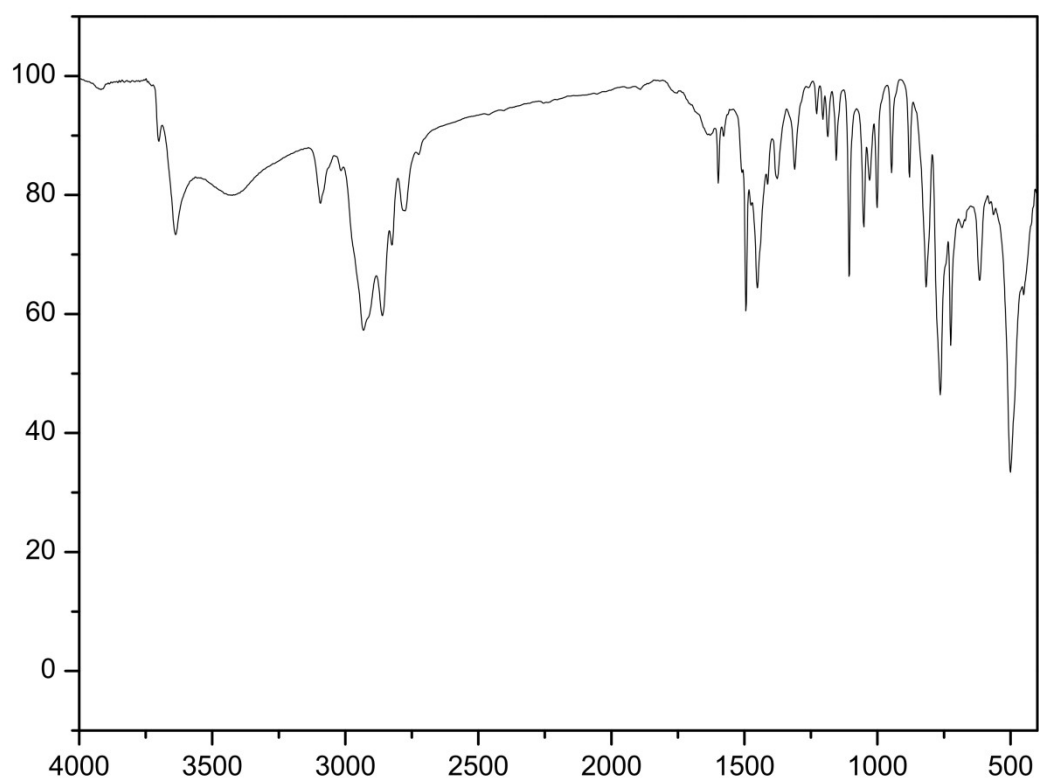

**Figure S3.** FT-IR spectrum (KBr) of  $(\text{FcC}_5\text{Me}_4)\text{Sc}(\text{CH}_2\text{C}_6\text{H}_4\text{NMe}_2\text{-o})_2$  (**1**)

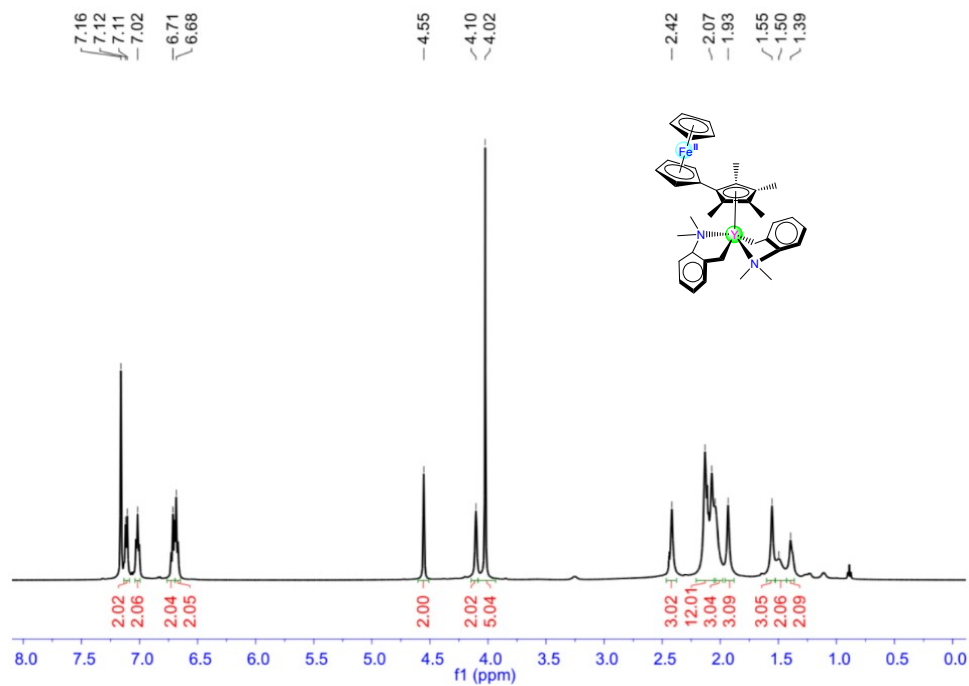

**Figure S4.**  $^1\text{H}$  NMR spectrum of  $(\text{FcC}_5\text{Me}_4)\text{Y}(\text{CH}_2\text{C}_6\text{H}_4\text{NMe}_2\text{-o})_2$  (**2**) in  $\text{C}_6\text{D}_6$  (298K, 500 MHz)

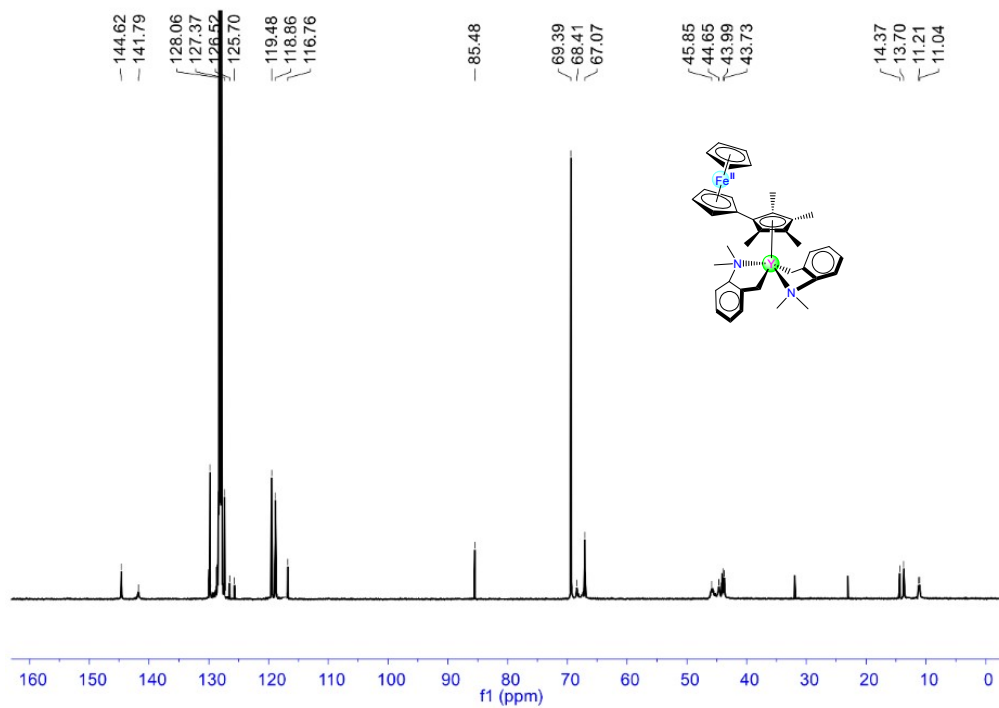

**Figure S5.**  $^{13}\text{C}$  NMR spectrum of  $(\text{FcC}_5\text{Me}_4)\text{Y}(\text{CH}_2\text{C}_6\text{H}_4\text{NMe}_2\text{-o})_2$  (**2**) in  $\text{C}_6\text{D}_6$  (298K, 125 MHz)

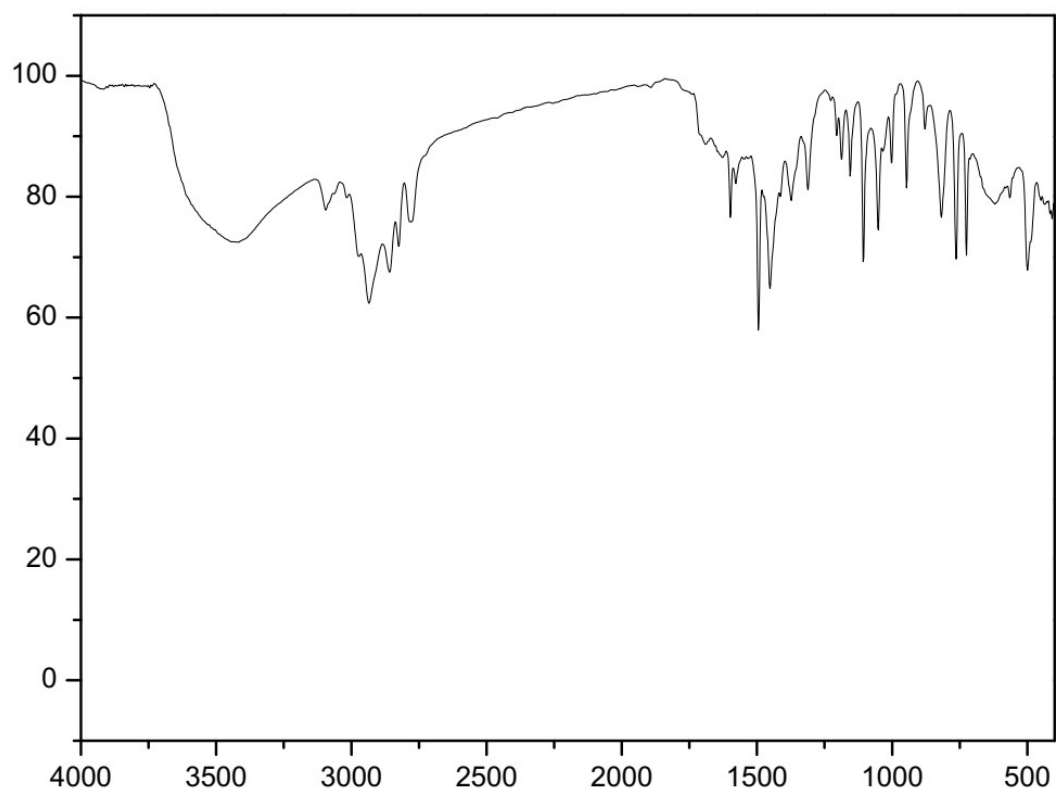

**Figure S6.** FT-IR spectrum (KBr) of  $(\text{FcC}_5\text{Me}_4)\text{Y}(\text{CH}_2\text{C}_6\text{H}_4\text{NMe}_2\text{-o})_2$  (**2**)

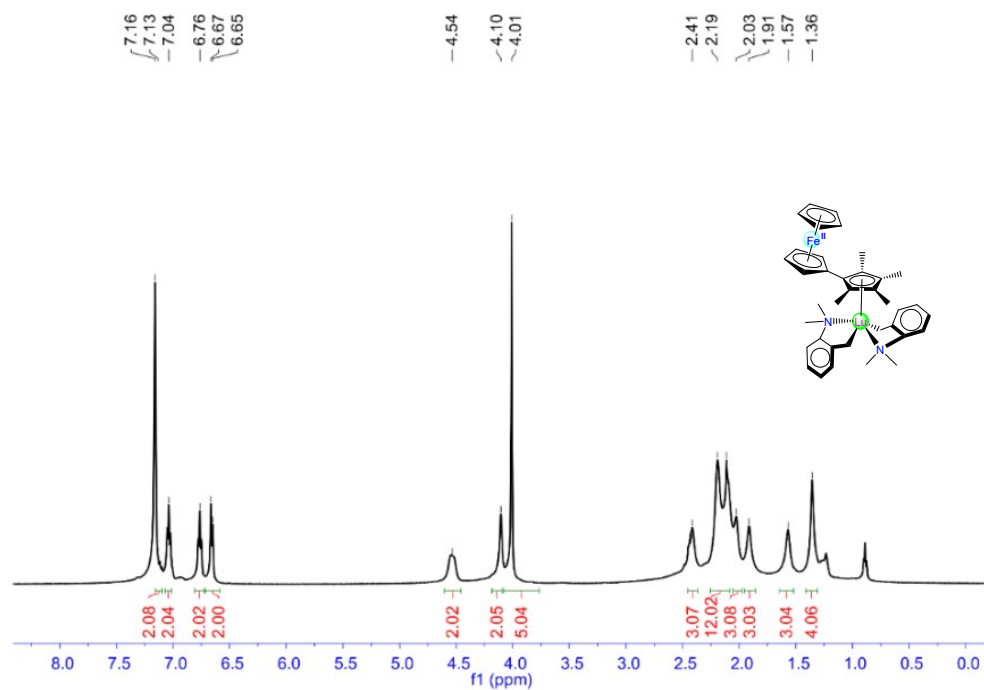

**Figure S7.**  $^1\text{H}$  NMR spectrum of  $(\text{FcC}_5\text{Me}_4)\text{Lu}(\text{CH}_2\text{C}_6\text{H}_4\text{NMe}_2\text{-o})_2$  (**3**) in  $\text{C}_6\text{D}_6$  (298K, 500 MHz)

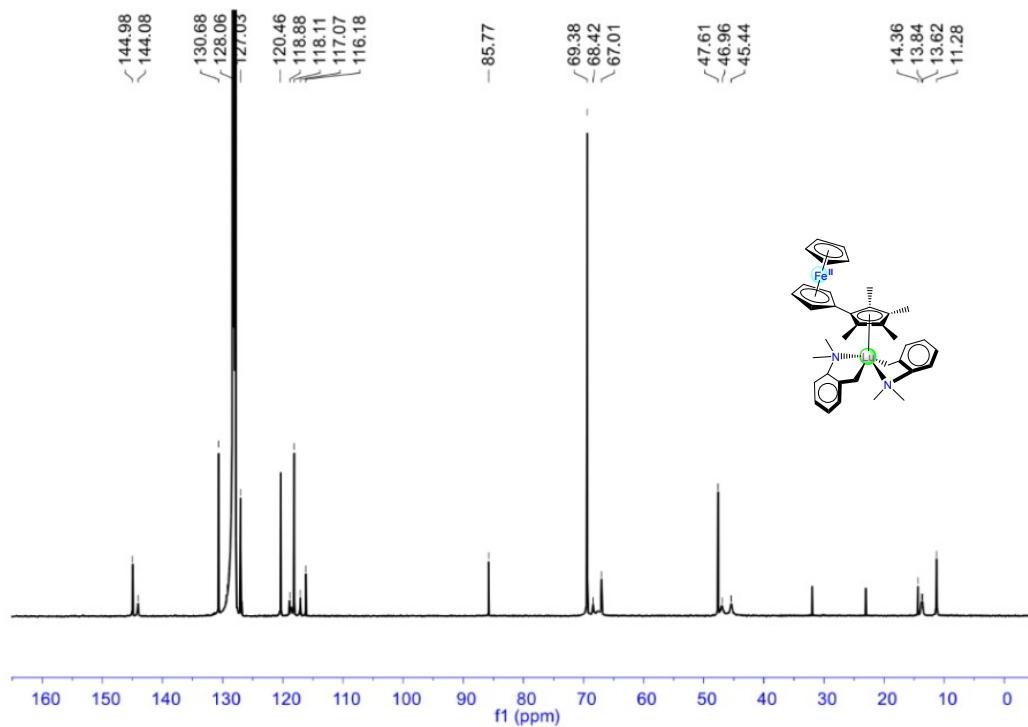

**Figure S8.**  $^{13}\text{C}$  NMR spectrum of  $(\text{FcC}_5\text{Me}_4)\text{Lu}(\text{CH}_2\text{C}_6\text{H}_4\text{NMe}_2\text{-o})_2$  (**3**) in  $\text{C}_6\text{D}_6$  (298K, 125 MHz)

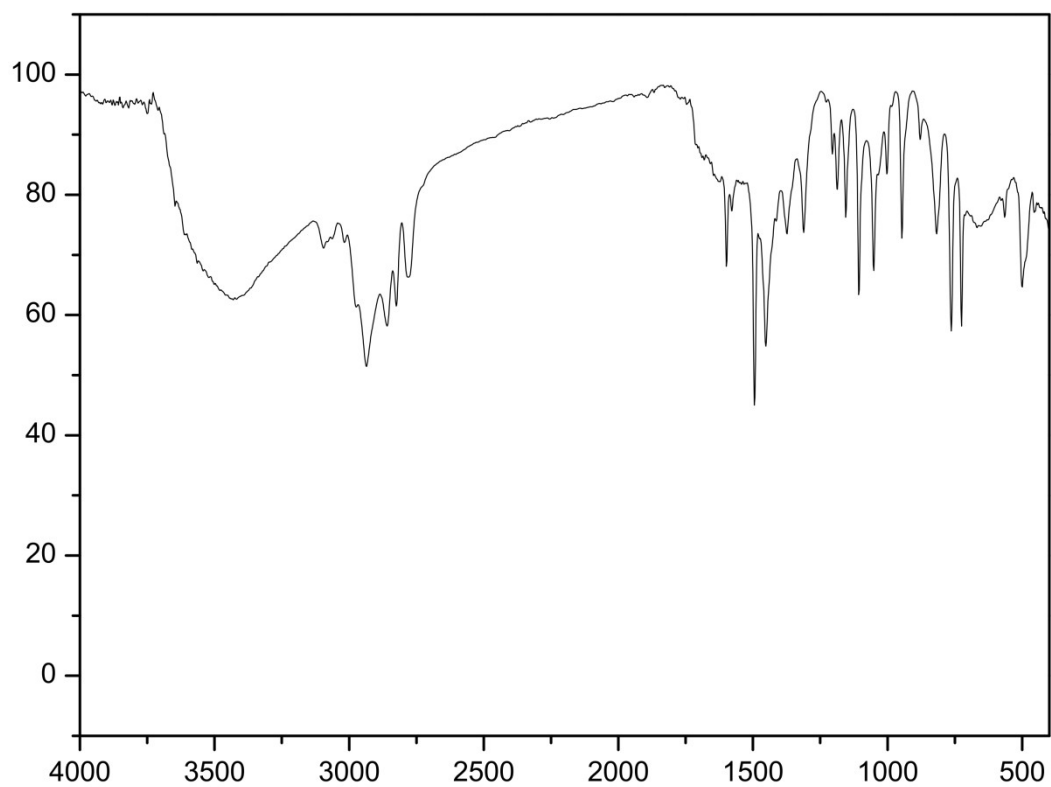

**Figure S9.** FT-IR spectrum (KBr) of  $(\text{FcC}_5\text{Me}_4)\text{Y}(\text{CH}_2\text{C}_6\text{H}_4\text{NMe}_2\text{-o})_2$  (**3**)
